# Supplementary material for: Absence of evidence is not evidence of absence: Nanopore sequencing and complete assembly of the European lobster (Homarus gammarus) mitogenome uncovers the missing nad2 and a new major gene cluster duplication
Source: PubMed Central journal article supplement (PMC6500004; doi:10.1186/s12864-019-5704-3), 2019-05-03
Supplement: 12864_2019_5704_MOESM3_ESM.pdf [file 12864_2019_5704_MOESM3_ESM.pdf]

Primer\_binding

| Query (Primer) | Subject(mitogenome) | Identity | AlignmentLength | qstart | qend | sstart | send | evaluate | bitscore | Est. Size |
|----------------|---------------------|----------|-----------------|--------|------|--------|------|----------|----------|-----------|
| I_Hom3F_3kb    | Hgam                | 100      | 18              | 3      | 20   | 1730   | 1747 | 8.28E-06 | 34.4     | 2836      |
| I_Hom3R_3kb    | Hgam                | 95.652   | 23              | 1      | 23   | 4566   | 4544 | 8.54E-07 | 38.1     | 2836      |
| I_Hom3F_3kb    | Hgam                | 95       | 20              | 1      | 20   | 5630   | 5648 | 0.00011  | 30.7     | 2835      |
| I_Hom3R_3kb    | Hgam                | 95.652   | 23              | 1      | 23   | 8465   | 8443 | 8.54E-07 | 38.1     | 2835      |
